# Supplementary material for: Integration of Metabolic and Quorum Sensing Signals Governing the Decision to Cooperate in a Bacterial Social Trait
Source: PubMed Central journal article supplement (PMC4477906; doi:10.1371/journal.pcbi.1004279), 2015-06-23
Supplement: pcbi.1004279.s001.pdf [file pcbi.1004279.s001.pdf]

**Table S1**

| Experiment                               | Carbon Limitation | Nitrogen Limitation | Iron Limitation | Nutrient Depletion | Quorum Sensing |
|------------------------------------------|-------------------|---------------------|-----------------|--------------------|----------------|
| Replicate Wells for displayed experiment | 6                 | 12                  | 6               | 6                  | 6              |
| Biological Replicates                    | 3                 | 3                   | 3               | 4                  | 3              |
