# Supplementary material for: Integration of Metabolic and Quorum Sensing Signals Governing the Decision to Cooperate in a Bacterial Social Trait
Source: PubMed Central journal article supplement (PMC4477906; doi:10.1371/journal.pcbi.1004279), 2015-06-23
Supplement: pcbi.1004279.s002.pdf [file pcbi.1004279.s002.pdf]

**Table S2**

| <b>Growth Curve</b>                                         | <b>Lag Phase [hours]</b> |
|-------------------------------------------------------------|--------------------------|
| <b>Carbon Limitation</b>                                    |                          |
| 0.50 gC/L                                                   | 4.4228                   |
| 0.25 gC/L                                                   | 3.9737                   |
| 0.125 gC/L                                                  | 3.6973                   |
| 0.063 gC/L                                                  | 3.0001                   |
| <b>Nitrogen Limitation</b>                                  |                          |
| 0.0625 gN/L                                                 | 3.1000                   |
| 0.0312 gN/L                                                 | 4.3812                   |
| 0.0156 gN/L                                                 | 2.6570                   |
| 0.0078 gN/L                                                 | 3.2814                   |
| <b>Iron Limitation<br/>(Supplemented<br/>Concentration)</b> |                          |
| $6.981 \times 10^{-5}$ gFe/L                                | 2.7400                   |
| $3.490 \times 10^{-5}$ gFe/L                                | 2.6322                   |
| $1.745 \times 10^{-5}$ gFe/L                                | 2.6269                   |
| $8.726 \times 10^{-6}$ gFe/L                                | 3.2804                   |
| $4.362 \times 10^{-6}$ gFe/L                                | 3.1083                   |
| $2.181 \times 10^{-6}$ gFe/L                                | 3.5053                   |
| $1.089 \times 10^{-6}$ gFe/L                                | 4.5329                   |
| 0 gFe/L                                                     | 4.6104                   |
| <b>Quorum Sensing</b>                                       |                          |
| 4 X                                                         | 6.5532                   |
| 2 X                                                         | 6.4149                   |
| 1 X                                                         | 6.4797                   |
| ½ X                                                         | 6.2006                   |
| ¼ X                                                         | 5.4931                   |
| 0                                                           | 4.1117                   |
