# Supplementary material for: Integration of Metabolic and Quorum Sensing Signals Governing the Decision to Cooperate in a Bacterial Social Trait
Source: PubMed Central journal article supplement (PMC4477906; doi:10.1371/journal.pcbi.1004279), 2015-06-23
Supplement: pcbi.1004279.s003.pdf [file pcbi.1004279.s003.pdf]

**Table S3**

| <b>Parameter</b> | <b>Units</b> | <b>Represents</b>                                                           | <b>Value in displayed fit</b> |
|------------------|--------------|-----------------------------------------------------------------------------|-------------------------------|
| $\mu_{\max}$     | $h^{-1}$     | Maximum growth rate when $N > 0$                                            | 0.3341                        |
| $Y_C$            | OD/gC        | Yield for carbon                                                            | 0.6516                        |
| $k_d$            | $h^{-1}$     | decay when $C = 0$                                                          | 0.0062                        |
| $Y_N$            | OD/gN        | Yield for nitrogen                                                          | 4.1627                        |
| $\mu_{\max}'$    | $h^{-1}$     | Maximum growth rate when $N = 0$                                            | 0.0616                        |
| $Y_{Ni}$         | OD/ $N_i$    | Yield for internal nitrogen                                                 | 2.0011                        |
| $Y_{Fe}$         | OD/gFe       | Yield for iron                                                              | $3.8952 * 10^3$               |
| $Y_{Fei}$        | OD/ $I_i$    | Yield for internal iron                                                     | 4.9892                        |
| $q_D$            | GFP/OD       | Density dependent scaling factor                                            | $1.8542 * 10^4$               |
| $q_{RN}$         | GFP          | Nitrogen starvation upregulation scaling factor                             | $7.4541 * 10^3$               |
| $k_{gN}$         | -            | Fraction of $\mu_{\max}$ in nitrogen starvation when down regulation begins | 0.1667                        |
| $h_N$            | -            | Hill coefficient nitrogen starvation down regulation                        | 5.8725                        |
| $q_{RFe}$        | GFP          | Iron starvation upregulation scaling factor                                 | $8.5933 * 10^3$               |
| $k_{gFe}$        | -            | Fraction of $\mu_{\max}$ in iron starvation when down regulation begins     | 0.3293                        |
| $h_{Fe}$         | -            | Hill coefficient iron starvation down regulation                            | 4.9892                        |
