# Supplementary material for: Integration of Metabolic and Quorum Sensing Signals Governing the Decision to Cooperate in a Bacterial Social Trait
Source: PubMed Central journal article supplement (PMC4477906; doi:10.1371/journal.pcbi.1004279), 2015-06-23
Supplement: pcbi.1004279.s004.pdf [file pcbi.1004279.s004.pdf]

**Table S4**

| Variable                                         | $\mu_{\max}$  | $Y_C$         | $k_d$         | $Y_N$         | $\mu_{\max}'$ | $Y_{Ni}$          | $Y_{Fe}$                       | $Y_{Fei}$         |
|--------------------------------------------------|---------------|---------------|---------------|---------------|---------------|-------------------|--------------------------------|-------------------|
| Units                                            | $h^{-1}$      | OD/gC         | $h^{-1}$      | OD/gN         | $h^{-1}$      | OD/N <sub>i</sub> | OD/gFe                         | OD/l <sub>i</sub> |
| <b>Fit with all data</b>                         | <b>0.3341</b> | <b>0.6516</b> | <b>0.0062</b> | <b>4.1627</b> | <b>0.0616</b> | <b>2.0011</b>     | <b>3.8952 * 10<sup>3</sup></b> | <b>4.9892</b>     |
| Highest parameter value fitted with 2/3 data     | 0.3464        | 0.6611        | 0.0061        | 4.2644        | 0.0614        | 2.0492            | 3.6548 * 10 <sup>3</sup>       | 5.1533            |
| Lowest parameter value fitted with with 2/3 data | 0.3243        | 0.6387        | 0.0059        | 4.1799        | 0.0601        | 1.9234            | 3.9305 * 10 <sup>3</sup>       | 5.2690            |
