# Supplementary material for: Integration of Metabolic and Quorum Sensing Signals Governing the Decision to Cooperate in a Bacterial Social Trait
Source: PubMed Central journal article supplement (PMC4477906; doi:10.1371/journal.pcbi.1004279), 2015-06-23
Supplement: pcbi.1004279.s005.pdf [file pcbi.1004279.s005.pdf]

**Table S5**

| Variable                                              | $q_D$                             | $q_{RN}$                          | $k_{gN}$      | $h_N$         | $q_{RFe}$                         | $k_{gFe}$     | $h_{Fe}$      |
|-------------------------------------------------------|-----------------------------------|-----------------------------------|---------------|---------------|-----------------------------------|---------------|---------------|
| Units                                                 | GFP/OD                            | GFP                               | -             | -             | GFP                               | -             | -             |
| <b>Fit with all data</b>                              | <b><math>1.8542 * 10^4</math></b> | <b><math>7.4541 * 10^3</math></b> | <b>0.1667</b> | <b>5.8725</b> | <b><math>8.5933 * 10^3</math></b> | <b>0.3293</b> | <b>1.9158</b> |
| Highest parameter value fitted with 4 replicates each | $1.9005 * 10^4$                   | $9.4672 * 10^3$                   | 0.1765        | 5.7399        | $8.2950 * 10^3$                   | 0.3193        | 1.9554        |
| Lowest parameter fitted with with 4 replicates each   | $1.7595 * 10^4$                   | $6.2586 * 10^3$                   | 0.1662        | 5.2734        | $7.1706 * 10^3$                   | 0.2926        | 1.9274        |
